# Supplementary material for: Serial Viral Load Analysis by Ddpcr to Evaluate Fnc Efficacy and Safety in the Treatment of Mild Cases of Covid-19
Source: Research Square preprint supplement (doi:10.21203/rs.3.rs-2273694/v1), 2022-11-21
Supplement: Supplementary file 1 [file cdedb32f8a0fdf3b3393b8ee.docx]

**SUPPLEMENTARY INFORMATION**

**1. SUPPLEMENTARY RESULTS**


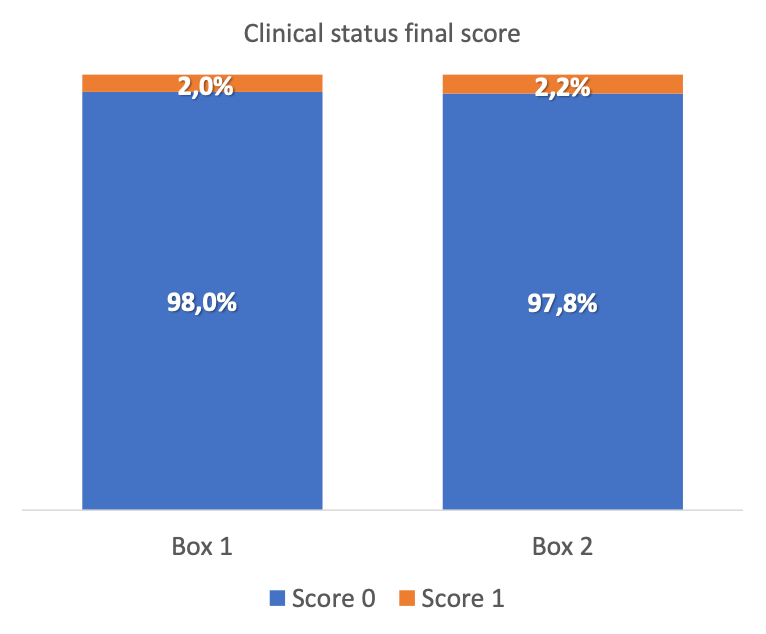


**Supplementary Figure 1:** Proportion of the initial and final clinical score of all subjects in the FNC group and the placebo group. The p value represents the significant difference between groups by the Wilcoxon test (BOX1: FNC; BOX 2: CONTROL).


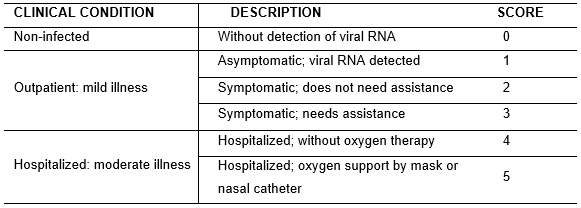


**Supplementary Figure 2:** scores of the study related to clinical picture.


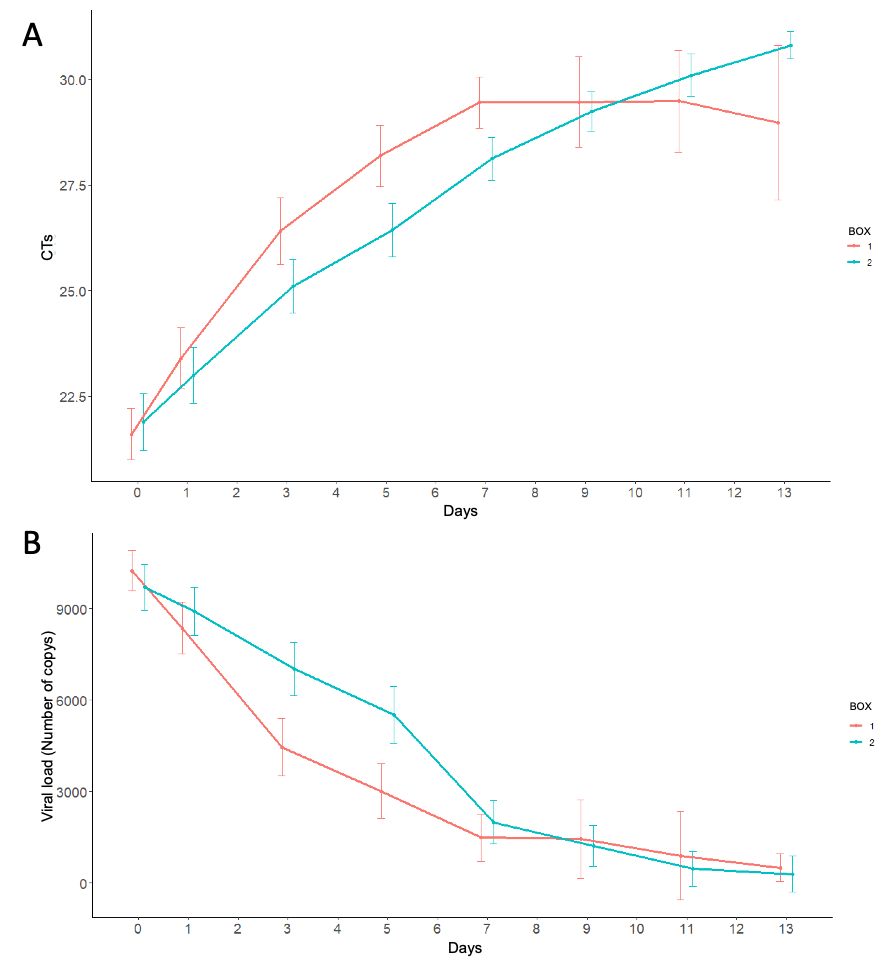


**Supplementary Figure 3:** Ciral load (B) analysis measured by RT-PCR of all participants in the FNC group and the placebo group. Data are median (SD).

**Supplementary Table 1:** Demographic and baseline characteristics of participants.


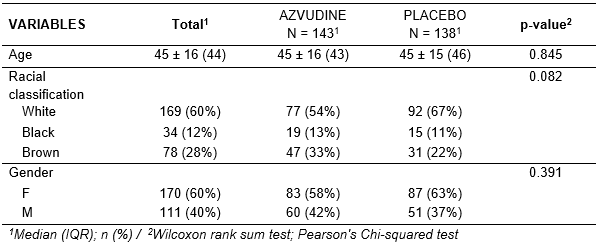


**Supplementary Table 2:** Mean score index (WHO Clinical Improvement Ordinal Scale) of participants at the beginning and final of the clinical research.


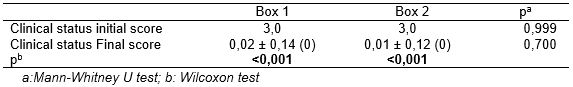


**Supplementary Table 3:**

| VARIABLES | Total1 | AZVUDINE  N = 1431 | PLACEBO  N = 1381 | p-value2 | |
| --- | --- | --- | --- | --- | --- |
| Viral load (D0) | 9.971 ± 4.257 (11.553) | 10.239 ± 3.985 (11.593) | 9.694 ± 4.519 (11.394) | | 0.543 |
| Viral load (D1) | 8.631 ± 4.897 (10.756) | 8.359 ± 5.083 (10.834) | 8.909 ± 4.702 (10.717) | | 0.634 |
| Viral load l(D3) | 5.733 ± 5.503 (1.037) | 4.452 ± 5.564 (969) | 7.023 ± 5.146 (10.000) | | **<0.001** |
| Viral load l(D5) | 4.285 ± 5.189 (971) | 3.016 ± 4.897 (0) | 5.513 ± 5.187 (9.642) | | **<0.001** |
| Viral load (D7) | 1.773 ± 3.613 (63) | 1.483 ± 3.516 (0) | 1.987 ± 3.684 (967) | | **<0.001** |
| Viral load D9) | 1.276 ± 3.282 (0) | 1.439 ± 3.653 (0) | 1.214 ± 3.149 (29) | | 0.064 |
| Viral load (D11) | 556 ± 2.230 (0) | 902 ± 2.637 (0) | 462 ± 2.124 (0) | | 0.712 |
| Viral load (D13) | 334 ± 1.526 (0) | 501 ± 536 (491) | 294 ± 1.685 (0) | | **0.002** |
| CTs(D0) | 21.3 (18.9 - 24.8) | 21.1 (19.0 - 24.4) | 21.6 (18.5 - 25.2) | | 0.490 |
| CTs(D1) | 23.0 (20.0 - 26.4) | 23.0 (20.0 - 26.6) | 23.0 (20.0 - 25.9) | | 0.523 |
| CTs(D3) | 26.1 (23.1 - 29.8) | 28.0 (23.0 - 31.0) | 25.1 (23.1 - 27.8) | | **<0.001** |
| CTs(D5) | 27.9 (25.0 - 31.0) | 31.0 (25.8 - 31.0) | 26.0 (24.6 - 29.6) | | **<0.001** |
| CTs(D7) | 29.80 (26.83 - 31.00) | 31.00 (27.65 - 31.00) | 28.00 (26.80 - 31.00) | | **<0.001** |
| CTs(D9) | 31.00 (28.50 - 31.00) | 31.00 (30.10 - 31.00) | 29.80 (28.50 - 31.00) | | 0.062 |
| CTs(D11) | 31.00 (29.92 - 31.00) | 31.00 (28.25 - 31.00) | 31.00 (30.15 - 31.00) | | 0.708 |
| CTs(D13) | 31.00 (31.00 - 31.00) | 29.20 (27.18 - 31.00) | 31.00 (31.00 - 31.00) | | 0.002 |
| *1n (%); Median (IQR) / 2 Mann-Whitney test; Wilcoxon rank sum exact test* | | | | | | |

**Supplementary Table 4**: Time for improvement of symptoms.

| VARIABLES | Total1 | AZVUDINE  N = 1431 | PLACEBO  N = 1381 | p-value2 |
| --- | --- | --- | --- | --- |
| Myalgia (Qty.days) | 2.07 ± 1.42 (1.00) | 2.00 ± 1.30 (1.50) | 2.13 ± 1.53 (1.00) | 0.959 |
| Lost olphate (Qty.days) | 2.67 ± 1.84 (2.00) | 2.17 ± 1.37 (2.00) | 3.07 ± 2.09 (3.00) | 0.107 |
| Lost palate (Qty.days) | 2.48 ± 1.78 (2.00) | 1.96 ± 1.10 (2.00) | 2.94 ± 2.12 (2.50) | 0.050 |
| Diarrhea (Qty.days) | 2.08 ± 1.51 (1.50) | 2.18 ± 1.59 (1.50) | 1.98 ± 1.44 (1.50) | 0.706 |
| Dizziness (Qty.days) | 1.97 ± 1.31 (1.00) | 1.69 ± 1.17 (1.00) | 2.23 ± 1.41 (2.00) | 0.095 |
| Fever (Qty.days) | 1.26 ± 0.60 (1.00) | 1.29 ± 0.64 (1.00) | 1.24 ± 0.56 (1.00) | 0.896 |
| Chill (Qty.days) | 1.78 ± 1.04 (1.00) | 1.61 ± 0.86 (1.00) | 2.00 ± 1.20 (2.00) | 0.213 |
| Sore throat (Qty.days) | 2.08 ± 1.39 (2.00) | 1.88 ± 1.18 (2.00) | 2.26 ± 1.55 (2.00) | 0.367 |
| Coryza (Qty.days) | 2.54 ± 1.97 (2.00) | 2.24 ± 1.66 (2.00) | 2.80 ± 2.19 (2.00) | 0.207 |
| Dyspnea (Qty.days) | 2.52 ± 1.80 (2.00) | 2.18 ± 1.17 (2.00) | 2.89 ± 2.26 (2.00) | 0.328 |
| Tachypnea (Qty.days) | 1.60 ± 0.85 (1.00) | 1.50 ± 0.92 (1.00) | 1.71 ± 0.77 (2.00) | 0.251 |
| Nausea (Qty.days) | 1.89 ± 1.43 (1.00) | 1.84 ± 1.14 (1.00) | 1.94 ± 1.70 (1.00) | 0.639 |
| Vomit (Qty.days) | 1.60 ± 1.44 (1.00) | 1.40 ± 0.63 (1.00) | 1.90 ± 2.18 (1.00) | 0.973 |
| Abdominal pain (Qty.days) | 2.32 ± 2.09 (1.00) | 2.22 ± 1.53 (2.00) | 2.40 ± 2.45 (1.00) | 0.413 |
| Disability march (Qty.days) | 2.00 ± 1.73 (1.00) | 2.67 ± 2.89 (1.00) | 1.67 ± 1.03 (1.00) | 0.877 |
| *1n (%); Median (IQR) / 2Mann-Whitney test Wilcoxon rank sum test* | | | | |

**Supplementary Table 5: Comorbidities**

| VARIABLES | **N** | | | **Total1** | Azvudine  N = 1431 | Placebo  N = 1381 | **p-value2** |
| --- | --- | --- | --- | --- | --- | --- | --- |
| Insomnia | | 281 | 99 (35%) | | 55 (38%) | 44 (32%) | 0.249 |
| Arterial hypertension | | 281 | 83 (30%) | | 44 (31%) | 39 (28%) | 0.645 |
| Constipation | | 281 | 44 (16%) | | 18 (13%) | 26 (19%) | 0.149 |
| Gastritis | | 281 | 38 (14%) | | 22 (15%) | 16 (12%) | 0.353 |
| Labyrinthitis | | 281 | 35 (12%) | | 21 (15%) | 14 (10%) | 0.249 |
| Obesity | | 281 | 31 (11%) | | 18 (13%) | 13 (9.4%) | 0.397 |
| Hepatic steatosis | | 281 | 23 (8.2%) | | 14 (9.8%) | 9 (6.5%) | 0.318 |
| Smoker | | 281 | 22 (7.8%) | | 12 (8.4%) | 10 (7.2%) | 0.721 |
| Type 2 diabetes (non-insulin dependent) | | 281 | 20 (7.1%) | | 8 (5.6%) | 12 (8.7%) | 0.312 |
| Irritable bowel syndrome | | 281 | 17 (6.0%) | | 12 (8.4%) | 5 (3.6%) | 0.094 |
| Alcoholic | | 281 | 18 (6.4%) | | 8 (5.6%) | 10 (7.2%) | 0.572 |
| Rheumatic disease | | 281 | 18 (6.4%) | | 9 (6.3%) | 9 (6.5%) | 0.938 |
| Bronchitis | | 281 | 15 (5.3%) | | 10 (7.0%) | 5 (3.6%) | 0.209 |
| Cardiac arrhythmia | | 281 | 14 (5.0%) | | 8 (5.6%) | 6 (4.3%) | 0.631 |
| Kidney stone | | 281 | 14 (5.0%) | | 7 (4.9%) | 7 (5.1%) | 0.946 |
| Osteoporosis | | 281 | 13 (4.6%) | | 4 (2.8%) | 9 (6.5%) | 0.137 |
| Asthma | | 281 | 7 (2.5%) | | 4 (2.8%) | 3 (2.2%) | >0.999 |
| Type 1 diabetes (insulin dependent) | | 281 | 7 (2.5%) | | 4 (2.8%) | 3 (2.2%) | >0.999 |
| Cardiac arrhythmia | | 281 | 6 (2.1%) | | 5 (3.5%) | 1 (0.7%) | 0.214 |
| Endometriosis | | 281 | 4 (1.4%) | | 4 (2.8%) | 0 (0%) | 0.123 |
| Coronary angioplasty (stent) | | 281 | 4 (1.4%) | | 1 (0.7%) | 3 (2.2%) | 0.364 |
| Angina | | 281 | 3 (1.1%) | | 1 (0.7%) | 2 (1.4%) | 0.617 |
| Cardiac revascularization | | 281 | 2 (0.7%) | | 1 (0.7%) | 1 (0.7%) | >0.999 |
| Stroke | | 281 | 1 (0.4%) | | 1 (0.7%) | 0 (0%) | >0.999 |

**Supplementary Table 6:** **Total values of urea, creatinine and uric acid.**

| VARIÁVEIS | **N** | **Total1** | AZVUDINE  N = 1431 | PLACEBO  N = 1381 | **p-value2** |
| --- | --- | --- | --- | --- | --- |
| Urea (D1) | 270 | 28 ± 9 (28) | 27 ± 9 (27) | 28 ± 10 (29) | 0.356 |
| Urea (D3) | 218 | 31 ± 10 (29) | 31 ± 9 (31) | 31 ± 11 (29) | 0.437 |
| Urea (D5) | 203 | 31 ± 11 (28) | 30 ± 10 (28) | 31 ± 12 (30) | 0.800 |
| Urea (D7) | 149 | 31 ± 11 (30) | 31 ± 10 (30) | 31 ± 12 (30) | 0.888 |
| Urea (D9) | 94 | 31 ± 11 (29) | 30 ± 9 (29) | 32 ± 11 (30) | 0.494 |
| Urea (D11) | 56 | 31 ± 10 (30) | 30 ± 11 (28) | 31 ± 10 (30) | 0.570 |
| Urea (D13) | 33 | 30 ± 9 (31) | 30 ± 9 (31) | 30 ± 10 (31) | 0.981 |
| Urea (D15) | 251 | 31 ± 10 (29) | 31 ± 10 (30) | 30 ± 11 (29) | 0.402 |
| Urea (D28) | 275 | 28 ± 9 (27) | 28 ± 8 (27) | 28 ± 10 (27) | 0.594 |
| Creatinine (D0) | 281 | 0.84 (0.72 - 1.05) | 0.84 (0.75 - 1.06) | 0.85 (0.70 - 1.05) | 0.712 |
| Creatinine (D1) | 281 | 0.89 ± 0.25 (0.84) | 0.89 ± 0.24 (0.84) | 0.88 ± 0.26 (0.85) | 0.712 |
| Creatinine (D3) | 270 | 0.92 ± 0.60 (0.87) | 0.89 ± 0.25 (0.85) | 0.96 ± 0.82 (0.87) | 0.747 |
| Creatinine (D5) | 219 | 0.82 ± 0.19 (0.82) | 0.83 ± 0.22 (0.82) | 0.81 ± 0.17 (0.81) | 0.754 |
| Creatinine (D7) | 203 | 0.85 ± 0.23 (0.83) | 0.84 ± 0.24 (0.81) | 0.86 ± 0.23 (0.84) | 0.493 |
| Creatinine (D9) | 149 | 1.07 ± 2.72 (0.84) | 1.50 ± 4.60 (0.84) | 0.84 ± 0.20 (0.85) | 0.911 |
| Creatinine (D11) | 94 | 0.85 ± 0.24 (0.82) | 0.83 ± 0.24 (0.78) | 0.86 ± 0.24 (0.83) | 0.584 |
| Creatinine (D13) | 56 | 0.81 ± 0.25 (0.81) | 0.85 ± 0.18 (0.84) | 0.81 ± 0.26 (0.80) | 0.489 |
| Creatinine (D15) | 33 | 0.84 ± 0.27 (0.85) | 0.79 ± 0.25 (0.89) | 0.85 ± 0.28 (0.82) | >0.999 |
| Creatinine (D28) | 252 | 0.85 ± 0.21 (0.84) | 0.86 ± 0.21 (0.84) | 0.84 ± 0.20 (0.84) | 0.917 |
| Uric acid (D1) | 270 | 4.02 ± 1.49 (3.90) | 4.12 ± 1.35 (4.00) | 3.92 ± 1.62 (3.79) | 0.183 |
| Uric acid (D3) | 218 | 3.90 ± 1.31 (3.80) | 4.01 ± 1.29 (3.90) | 3.80 ± 1.33 (3.80) | 0.283 |
| Uric acid (D5) | 203 | 4.00 ± 1.41 (3.97) | 4.07 ± 1.36 (4.00) | 3.94 ± 1.44 (3.90) | 0.590 |
| Uric acid (D7) | 149 | 4.15 ± 1.41 (4.10) | 4.20 ± 1.34 (4.05) | 4.13 ± 1.45 (4.10) | 0.858 |
| Uric acid (D9) | 94 | 4.45 ± 1.57 (4.41) | 4.38 ± 1.50 (4.20) | 4.48 ± 1.60 (4.50) | 0.555 |
| Uric acid D11) | 56 | 4.71 ± 1.67 (4.44) | 4.16 ± 0.88 (3.90) | 4.84 ± 1.79 (4.60) | 0.132 |
| Uric acid (D13) | 33 | 4.76 ± 1.83 (4.70) | 3.95 ± 0.64 (3.95) | 4.94 ± 1.96 (5.00) | 0.168 |
| Uric acid (D15) | 251 | 4.47 ± 1.49 (4.43) | 4.62 ± 1.41 (4.48) | 4.31 ± 1.57 (4.40) | 0.153 |
| Uric acid (D28) | 275 | 4.73 ± 1.50 (4.70) | 4.88 ± 1.40 (5.00) | 4.57 ± 1.59 (4.60) | 0.032 |
| Uric acid (D1) | 270 | 4.02 ± 1.49 (3.90) | 4.12 ± 1.35 (4.00) | 3.92 ± 1.62 (3.79) | 0.183 |
| Uric acid (D3) | 218 | 3.90 ± 1.31 (3.80) | 4.01 ± 1.29 (3.90) | 3.80 ± 1.33 (3.80) | 0.283 |
| Uric acid (D5) | 203 | 4.00 ± 1.41 (3.97) | 4.07 ± 1.36 (4.00) | 3.94 ± 1.44 (3.90) | 0.590 |
| Uric acid (D7) | 149 | 4.15 ± 1.41 (4.10) | 4.20 ± 1.34 (4.05) | 4.13 ± 1.45 (4.10) | 0.858 |
| Uric acid (D9) | 94 | 4.45 ± 1.57 (4.41) | 4.38 ± 1.50 (4.20) | 4.48 ± 1.60 (4.50) | 0.555 |
| *1Median (IQR); 2 Mann-Whitney test* | | | | | |

**Supplementary Table 7:** values of AST/TGO, ALT/TGP, GGT and BT.

| VARIABLES | **N** | **Total1** | AZVUDINE  N = 1431 | PLACEBO  N = 1381 | **p-value2** |
| --- | --- | --- | --- | --- | --- |
| AST/TGO(D0) | 281 | 34 ± 21 (31) | 34 ± 14 (32) | 34 ± 26 (29) | **0.015** |
| AST/TGO(D1) | 271 | 33 ± 15 (31) | 33 ± 13 (32) | 32 ± 17 (30) | 0.232 |
| AST/TGO (D3) | 219 | 34 ± 20 (30) | 34 ± 20 (31) | 33 ± 20 (30) | 0.345 |
| AST/TGO (D5) | 204 | 34 ± 20 (30) | 35 ± 22 (31) | 32 ± 17 (28) | 0.057 |
| AST/TGO (D7) | 149 | 31 ± 10 (29) | 34 ± 9 (32) | 29 ± 10 (28) | **<0.001** |
| AST/TGO (D9) | 95 | 34 ± 30 (28) | 37 ± 26 (32) | 33 ± 31 (27) | 0.039 |
| AST/TGO (D11) | 56 | 31 ± 13 (28) | 34 ± 10 (31) | 31 ± 14 (27) | 0.131 |
| AST/TGO (D13) | 33 | 30 ± 15 (28) | 40 ± 20 (34) | 28 ± 14 (28) | 0.141 |
| AST/TGO (D15) | 252 | 32 ± 16 (29) | 31 ± 15 (29) | 32 ± 18 (28) | 0.846 |
| AST/TGO (D28) | 275 | 31 ± 16 (29) | 31 ± 14 (29) | 30 ± 17 (28) | 0.062 |
| ALT/TGP(D0) | 281 | 27 ± 20 (22) | 28 ± 18 (23) | 26 ± 23 (21) | 0.052 |
| ALT/TGP(D1) | 271 | 27 ± 17 (23) | 27 ± 17 (23) | 26 ± 18 (22) | 0.567 |
| ALT/TGP (D3) | 219 | 31 ± 21 (24) | 30 ± 19 (23) | 32 ± 23 (24) | 0.693 |
| ALT/TGP (D5) | 204 | 33 ± 30 (24) | 34 ± 33 (26) | 32 ± 26 (23) | 0.218 |
| ALT/TGP (D7) | 149 | 32 ± 21 (26) | 34 ± 25 (28) | 30 ± 19 (24) | 0.320 |
| ALT/TGP (D9) | 95 | 36 ± 60 (24) | 32 ± 20 (27) | 38 ± 69 (24) | 0.434 |
| ALT/TGP (D11) | 56 | 31 ± 37 (21) | 29 ± 20 (22) | 32 ± 40 (21) | 0.726 |
| ALT/TGP (D13) | 33 | 27 ± 18 (22) | 35 ± 36 (22) | 25 ± 13 (23) | 0.944 |
| ALT/TGP (D15) | 252 | 29 ± 19 (24) | 30 ± 21 (24) | 28 ± 17 (23) | 0.344 |
| ALT/TGP (D28) | 275 | 26 ± 19 (21) | 27 ± 19 (21) | 25 ± 18 (21) | 0.508 |
| GGT(D1) | 271 | 43 ± 37 (29) | 47 ± 41 (32) | 38 ± 33 (28) | **0.027** |
| GGT(D3) | 219 | 47 ± 43 (32) | 51 ± 46 (37) | 43 ± 39 (29) | 0.059 |
| GGT(D5) | 204 | 46 ± 39 (34) | 50 ± 42 (37) | 42 ± 35 (30) | 0.054 |
| GGT(D7) | 149 | 43 ± 34 (32) | 50 ± 39 (40) | 39 ± 30 (30) | 0.059 |
| GGT(D9) | 95 | 48 ± 61 (32) | 51 ± 40 (42) | 46 ± 68 (30) | 0.285 |
| GGT(D11) | 65 | 41 ± 58 (28) | 47 ± 51 (32) | 39 ± 60 (25) | 0.384 |
| GGT(D13) | 33 | 42 ± 39 (31) | 67 ± 70 (32) | 37 ± 28 (31) | 0.315 |
| GGT(D15) | 252 | 41 ± 31 (32) | 44 ± 32 (34) | 37 ± 29 (31) | **0.029** |
| GGT(D28) | 275 | 39 ± 32 (29) | 43 ± 35 (32) | 35 ± 28 (26) | **0.011** |
| BT(D0) | 281 | 0.59 ± 0.28 (0.54) | 0.60 ± 0.31 (0.55) | 0.58 ± 0.25 (0.54) | 0.716 |
| BT(D1) | 270 | 0.63 ± 0.30 (0.57) | 0.63 ± 0.30 (0.59) | 0.64 ± 0.31 (0.55) | 0.985 |
| BT(D3) | 219 | 0.61 ± 0.28 (0.56) | 0.62 ± 0.27 (0.58) | 0.60 ± 0.30 (0.55) | 0.292 |
| BT(D5) | 203 | 0.65 ± 0.30 (0.61) | 0.71 ± 0.32 (0.66) | 0.60 ± 0.26 (0.57) | **0.005** |
| BT(D7) | 149 | 0.65 ± 0.25 (0.61) | 0.66 ± 0.23 (0.63) | 0.64 ± 0.26 (0.59) | 0.530 |
| BT(D9) | 95 | 0.64 ± 0.24 (0.61) | 0.68 ± 0.25 (0.65) | 0.63 ± 0.23 (0.61) | 0.407 |
| BT(D11) | 56 | 0.67 ± 0.21 (0.65) | 0.66 ± 0.22 (0.57) | 0.68 ± 0.21 (0.67) | 0.536 |
| BT(D15) | 33 | 0.63 ± 0.25 (0.58) | 0.62 ± 0.17 (0.56) | 0.63 ± 0.27 (0.58) | 0.981 |
| BT(D28) | 251 | 0.96 ± 4.64 (0.63) | 0.67 ± 0.31 (0.62) | 1.27 ± 6.62 (0.63) | 0.834 |

*1Median (IQR); 2 Mann-Whitney test*

**Supplementary Table 8:** **Biochemical analysis of blood.**

| VARIABLES | **N** | **Total1** | AZVUDINE  N = 1431 | PLACEBO  N = 1381 | **p-value2** |
| --- | --- | --- | --- | --- | --- |
| HGT(D0) | 281 | 99 (88 - 105) | 100 (92 - 108) | 98 (87 - 103) | **0.014** |
| HGT(D1) | 281 | 106 (93 - 123) | 110 (96 - 124) | 102 (93 - 121) | 0.27 |
| HGT(D2) | 281 | 106 (95 - 131) | 107 (95 - 132) | 106 (95 - 131) | 0.961 |
| HGT(D3) | 281 | 106 (97 - 131) | 105 (98 - 130) | 108 (97 - 134) | 0.983 |
| HGT(D4) | 281 | 105 (97 - 132) | 105 (97 - 130) | 106 (97 - 133) | 0.917 |
| HGT(D5) | 281 | 106 (95 - 130) | 103 (95 - 126) | 108 (96 - 131) | 0.574 |
| HGT(D6) | 281 | 107 (97 - 126) | 106 (97 - 126) | 107 (96 - 126) | 0.973 |
| HGT(D7) | 281 | 106 (98 - 137) | 102 (97 - 134) | 108 (98 - 138) | 0.526 |
| HGT(D8) | 281 | 107 (97 - 132) | 103 (93 - 132) | 111 (98 - 129) | 0.307 |
| HGT(D9) | 281 | 108 (97 - 136) | 106 (98 - 136) | 110 (97 - 135) | 0.706 |
| HGT(D10) | 281 | 103 (95 - 120) | 101 (94 - 143) | 104 (95 - 118) | 0.917 |
| HGT(D11) | 281 | 103 (97 - 129) | 104 (101 - 128) | 102 (94 - 128) | 0.209 |
| HGT(D12) | 281 | 119 (101 - 138) | 124 (116 - 164) | 114 (100 - 135) | 0.139 |
| HGT(D13) | 281 | 126 (112 - 150) | 144 (130 - 188) | 120 (106 - 142) | 0.029 |
| HGT(D14) | 281 | 117 (102 - 136) | 124 (102 - 138) | 117 (100 - 136) | 0.954 |
| Hemoglobin (D0) | 280 | 13.52 ± 1.38 (13.40) | 13.64 ± 1.41 (13.45) | 13.39 ± 1.34 (13.30) | 0.134 |
| Hemoglobin (D1) | 273 | 13.48 ± 1.75 (13.30) | 13.60 ± 2.04 (13.30) | 13.36 ± 1.39 (13.30) | 0.414 |
| Hemoglobin (D3) | 218 | 13.64 ± 2.15 (13.40) | 13.60 ± 1.49 (13.55) | 13.67 ± 2.62 (13.40) | 0.295 |
| Hemoglobin (D5) | 206 | 13.44 ± 1.37 (13.40) | 13.70 ± 1.39 (13.70) | 13.22 ± 1.32 (13.10) | **0.016** |
| Hemoglobin (D7) | 149 | 13.44 ± 1.39 (13.30) | 13.64 ± 1.45 (13.75) | 13.34 ± 1.36 (13.00) | 0.223 |
| Hemoglobin (D9) | 90 | 13.37 ± 1.36 (13.10) | 13.79 ± 1.36 (13.55) | 13.24 ± 1.34 (13.00) | 0.116 |
| Hemoglobin (D11) | 56 | 13.35 ± 2.75 (13.20) | 14.75 ± 5.50 (13.20) | 13.01 ± 1.39 (13.20) | 0.620 |
| Hemoglobin (D13) | 33 | 12.64 ± 1.50 (12.60) | 12.85 ± 0.70 (12.75) | 12.59 ± 1.64 (12.30) | 0.674 |
| Hemoglobin (D15) | 251 | 13.20 ± 1.92 (13.20) | 13.37 ± 1.69 (13.50) | 13.02 ± 2.13 (13.00) | 0.141 |
| Hemoglobin (D28 | 275 | 13.01 ± 1.78 (13.00) | 13.15 ± 1.85 (13.10) | 12.86 ± 1.69 (12.80) | 0.094 |
| Hematocrite (D0) | 280 | 40.8 ± 3.9 (40.8) | 41.2 ± 4.0 (41.1) | 40.4 ± 3.8 (40.4) | 0.081 |
| Hematocrite (D1) | 273 | 40.4 ± 4.0 (40.3) | 40.5 ± 4.0 (40.3) | 40.4 ± 4.0 (40.3) | 0.788 |
| Hematocrite (D3) | 218 | 40.7 ± 4.5 (40.8) | 40.8 ± 5.5 (41.2) | 40.6 ± 3.4 (40.2) | 0.171 |
| Hematocrite (D5) | 206 | 40.6 ± 3.9 (40.5) | 41.5 ± 3.9 (41.3) | 40.0 ± 3.8 (39.7) | 0.006 |
| Hematocrite (D7) | 149 | 40.5 ± 4.0 (39.7) | 41.0 ± 3.9 (40.9) | 40.3 ± 4.0 (39.3) | 0.224 |
| Hematocrite (D9) | 90 | 40.4 ± 3.9 (39.7) | 41.3 ± 3.5 (40.9) | 40.1 ± 4.0 (39.4) | 0.195 |
| Hematocrite (D11) | 56 | 39.6 ± 3.8 (39.7) | 39.6 ± 3.1 (39.4) | 39.6 ± 4.0 (40.1) | 0.820 |
| Hematocrite (D13) | 33 | 38.6 ± 4.3 (38.0) | 38.0 ± 2.3 (37.7) | 38.7 ± 4.7 (38.0) | 0.640 |
| Hematocrite (D15) | 251 | 40.1 ± 4.6 (40.0) | 40.6 ± 3.8 (40.6) | 39.6 ± 5.3 (39.6) | 0.117 |
| Hematocrite (D28) | 275 | 39.3 ± 5.2 (39.4) | 39.8 ± 5.3 (40.1) | 38.9 ± 4.9 (39.0) | 0.068 |
| Total Protein (D1) | 261 | 6.73 ± 1.90 (7.20) | 6.70 ± 1.88 (7.20) | 6.75 ± 1.93 (7.20) | 0.420 |
| Total Protein (D15) | 234 | 9.68 ± 45.81 (7.00) | 6.72 ± 1.65 (7.00) | 12.68 ± 65.05 (7.00) | 0.500 |
| Total Protein (D28) | 272 | 6.87 ± 1.30 (7.00) | 6.93 ± 1.13 (7.00) | 6.82 ± 1.45 (7.00) | 0.585 |
| Globulin (D1) | 261 | 2.76 ± 0.86 (2.90) | 2.75 ± 0.85 (2.90) | 2.77 ± 0.87 (2.90) | 0.840 |
| Globulin (D15) | 234 | 3.88 ± 17.82 (2.80) | 2.76 ± 0.76 (2.80) | 5.02 ± 25.30 (2.80) | 0.297 |
| Globulin (D28) | 272 | 2.75 ± 0.61 (2.80) | 2.79 ± 0.56 (2.80) | 2.71 ± 0.65 (2.80) | 0.555 |
| Albumin (D1) | 261 | 3.94 ± 1.14 (4.20) | 3.91 ± 1.14 (4.20) | 3.98 ± 1.14 (4.20) | 0.234 |
| Albumin (D15) | 234 | 3.97 ± 0.98 (4.10) | 3.96 ± 0.99 (4.12) | 3.98 ± 0.99 (4.10) | 0.753 |
| Albumin (D28) | 272 | 4.14 ± 0.76 (4.20) | 4.17 ± 0.62 (4.20) | 4.11 ± 0.89 (4.20) | 0.872 |
| *1Median (IQR); 2Mann-Whitney test* | | | | | |

Despite having significant data, the values are within the normal range. Total protein and globulin increased in D15 justifying an increase in antibody production in infectious diseases. However, no changes was observed for uric acid.

**Supplementary Table 9: Analysis of blood electrolytes.**

| VARIABLES | **N** | **Total1** | AZVUDINE  N = 1431 | PLACEBO  N = 1381 | **p-value2** |
| --- | --- | --- | --- | --- | --- |
| Sodium (D1) | 270 | 136.78 ± 14.76 (138.00) | 138.23 ± 2.73 (138.00) | 135.29 ± 20.78 (138.00) | 0.585 |
| Sodium (D3) | 217 | 135.60 ± 18.83 (138.00) | 133.78 ± 23.34 (138.00) | 137.27 ± 13.31 (138.67) | 0.051 |
| Sodium (D5) | 203 | 135.5 ± 18.3 (138.2) | 134.6 ± 20.5 (138.0) | 136.3 ± 16.3 (138.9) | 0.043 |
| Sodium (D7) | 149 | 136.2 ± 16.2 (138.0) | 137.4 ± 2.9 (138.0) | 135.5 ± 20.0 (138.0) | 0.264 |
| Sodium (D9) | 93 | 135.5 ± 14.5 (137.0) | 136.4 ± 3.6 (136.7) | 135.2 ± 16.9 (137.1) | 0.373 |
| Sodium (D11) | 56 | 137.16 ± 3.32 (137.52) | 137.03 ± 3.99 (138.43) | 137.19 ± 3.19 (137.00) | 0.509 |
| Sodium (D13) | 33 | 129 ± 33 (138) | 138 ± 3 (138) | 127 ± 37 (137) | 0.451 |
| Sodium (D15) | 251 | 135.5 ± 17.5 (138.0) | 136.3 ± 12.5 (137.7) | 134.6 ± 21.6 (138.0) | 0.165 |
| Sodium (D28) | 274 | 133.2 ± 24.5 (138.0) | 132.8 ± 25.7 (138.0) | 133.7 ± 23.1 (138.0) | 0.976 |
| Potassium (D1) | 267 | 4.05 ± 1.48 (4.30) | 4.02 ± 1.61 (4.30) | 4.09 ± 1.33 (4.28) | 0.752 |
| Potassium (D3) | 217 | 3.95 ± 1.53 (4.27) | 3.83 ± 1.63 (4.24) | 4.05 ± 1.42 (4.29) | 0.556 |
| Potassium (D5) | 203 | 4.04 ± 1.26 (4.25) | 4.13 ± 1.09 (4.40) | 3.96 ± 1.39 (4.12) | 0.027 |
| Potassium (D7) | 149 | 4.13 ± 1.08 (4.30) | 4.33 ± 0.77 (4.50) | 4.02 ± 1.21 (4.29) | 0.085 |
| Potassium (D9) | 93 | 4.42 ± 1.67 (4.50) | 5.00 ± 1.90 (4.50) | 4.20 ± 1.54 (4.46) | 0.386 |
| Potassium (D11) | 56 | 4.27 ± 1.35 (4.47) | 4.03 ± 1.40 (4.40) | 4.33 ± 1.35 (4.60) | 0.433 |
| Potassium (D13) | 33 | 4.26 ± 1.65 (4.60) | 4.38 ± 0.47 (4.37) | 4.23 ± 1.82 (4.63) | 0.575 |
| Potassium (D15) | 251 | 4.03 ± 1.67 (4.35) | 4.00 ± 1.88 (4.32) | 4.06 ± 1.44 (4.39) | 0.386 |
| Potassium (D28) | 272 | 4.11 ± 1.65 (4.30) | 4.02 ± 1.78 (4.30) | 4.22 ± 1.51 (4.30) | 0.854 |
| Chlorine (D1) | 265 | 105.7 ± 73.1 (102.0) | 107.2 ± 71.5 (102.0) | 104.3 ± 75.0 (102.0) | 0.292 |
| Chlorine (D3) | 217 | 99.6 ± 10.6 (101.5) | 98.7 ± 14.5 (101.8) | 100.4 ± 4.8 (101.0) | 0.811 |
| Chlorine (D5) | 203 | 99.9 ± 4.1 (100.4) | 99.5 ± 4.1 (100.0) | 100.2 ± 4.1 (101.5) | 0.122 |
| Chlorine (D7) | 149 | 99.7 ± 4.4 (100.0) | 99.5 ± 4.5 (100.0) | 99.9 ± 4.5 (100.0) | 0.658 |
| Chlorine (D9) | 93 | 100.4 ± 4.2 (101.0) | 101.0 ± 4.1 (102.0) | 100.2 ± 4.3 (101.0) | 0.402 |
| Chlorine (D11) | 56 | 100.6 ± 4.2 (101.4) | 101.5 ± 3.9 (103.7) | 100.4 ± 4.3 (101.1) | 0.368 |
| Chlorine (D13) | 33 | 101.6 ± 3.6 (102.0) | 100.9 ± 3.0 (101.0) | 101.8 ± 3.7 (102.0) | 0.574 |
| Chlorine (D15) | 251 | 99.9 ± 7.6 (101.0) | 100.4 ± 4.2 (101.4) | 99.4 ± 10.1 (101.0) | 0.830 |
| Chlorine (D28) | 274 | 100.8 ± 9.6 (102.0) | 100.7 ± 9.4 (102.0) | 100.8 ± 9.9 (102.0) | 0.985 |
| Calcium (D1) | 268 | 9.20 ± 1.18 (9.25) | 9.31 ± 0.75 (9.30) | 9.09 ± 1.49 (9.21) | 0.500 |
| Calcium (D3) | 217 | 9.73 ± 5.91 (9.33) | 9.41 ± 0.48 (9.40) | 10.02 ± 8.19 (9.21) | **0.049** |
| Calcium (D5) | 203 | 9.21 ± 0.85 (9.24) | 9.29 ± 0.58 (9.30) | 9.14 ± 1.01 (9.20) | 0.135 |
| Calcium (D7) | 149 | 9.28 ± 0.51 (9.30) | 9.35 ± 0.57 (9.35) | 9.24 ± 0.48 (9.28) | 0.268 |
| Calcium (D9) | 93 | 9.26 ± 0.52 (9.20) | 9.38 ± 0.65 (9.30) | 9.21 ± 0.46 (9.20) | 0.186 |
| Calcium (D11) | 56 | 9.33 ± 0.52 (9.30) | 9.20 ± 0.32 (9.14) | 9.37 ± 0.56 (9.30) | 0.438 |
| Calcium (D13) | 33 | 9.29 ± 0.60 (9.30) | 9.03 ± 0.48 (9.05) | 9.35 ± 0.62 (9.30) | 0.242 |
| Calcium (D15) | 251 | 9.18 ± 0.98 (9.20) | 9.31 ± 0.55 (9.27) | 9.04 ± 1.27 (9.17) | **0.042** |
| Calcium (D28) | 273 | 9.27 ± 0.94 (9.30) | 9.34 ± 0.94 (9.40) | 9.19 ± 0.94 (9.20) | **0.021** |
| *1Median (IQR); 2Mann-Whitney test* | | | | | |

The electrolyte values fluctuate, but within the normal range, demonstrating good safety.

**Supplementary Table 10: Demonstration of inflammatory marker values during the study days.**

| VARIABLES | **N** | **Total1** | AZVUDINE  N = 1431 | PLACEBO  N = 1381 | **p-value2** |
| --- | --- | --- | --- | --- | --- |
| US PCR(D1) | 263 | 4.6 ± 8.1 (2.0) | 3.6 ± 5.3 (1.6) | 5.6 ± 10.2 (3.3) | 0.161 |
| US PCR (D15) | 238 | 3.2 ± 4.6 (0.9) | 2.6 ± 3.6 (0.5) | 3.7 ± 5.3 (1.4) | 0.024 |
| US PCR (D28) | 274 | 2.51 ± 3.14 (0.68) | 2.43 ± 3.16 (0.75) | 2.60 ± 3.13 (0.55) | 0.996 |
| D Dimero(D1) | 281 | 300 ± 298 (270) | 289 ± 285 (270) | 311 ± 312 (270) | 0.696 |
| CPK-MB(D1) | 270 | 7 ± 9 (2) | 7 ± 10 (1) | 7 ± 9 (2) | 0.815 |
| CPK-MB(D15) | 239 | 6 ± 9 (0) | 5 ± 8 (0) | 7 ± 10 (0) | 0.451 |
| CPK-MB(D28) | 274 | 5 ± 11 (0) | 5 ± 10 (0) | 5 ± 12 (0) | 0.868 |
| Troponin I(D1) | 257 | 1.67 ± 3.80 (0.40) | 1.69 ± 3.52 (0.40) | 1.65 ± 4.07 (0.35) | 0.501 |
| Troponin I (D15) | 228 | 1.63 ± 3.17 (0.65) | 1.58 ± 2.67 (0.90) | 1.67 ± 3.63 (0.50) | 0.370 |
| Troponin I (D28) | 271 | 1.94 ± 3.35 (1.10) | 2.15 ± 3.83 (1.20) | 1.71 ± 2.74 (0.90) | 0.159 |
| TTPA (D1) | 273 | 29 ± 10 (33) | 29 ± 10 (33) | 29 ± 10 (33) | 0.859 |
| TTPA (D15) | 252 | 28 ± 10 (31) | 27 ± 11 (32) | 29 ± 9 (31) | 0.919 |
| TTPA (D28) | 275 | 32.2 ± 16.7 (33.0) | 31.7 ± 6.6 (33.0) | 32.7 ± 22.9 (33.0) | 0.467 |
| TAP (D1) | 273 | 18.2 ± 100.2 (13.0) | 12.2 ± 3.5 (13.0) | 24.4 ± 142.5 (13.0) | 0.782 |
| TAP (D15) | 252 | 16.4 ± 71.1 (13.0) | 20.5 ± 99.4 (13.0) | 12.2 ± 3.6 (13.0) | 0.599 |
| TAP (D28) | 275 | 13.03 ± 2.24 (13.00) | 13.20 ± 1.71 (13.00) | 12.86 ± 2.68 (13.00) | 0.032 |
| ESR (D1) | 260 | 20 ± 19 (11) | 20 ± 20 (10) | 20 ± 17 (13) | 0.357 |
| ESR (D15) | 244 | 17 ± 19 (6) | 15 ± 17 (5) | 19 ± 20 (7) | 0.168 |
| ESR (D28) | 273 | 19 ± 18 (9) | 19 ± 19 (9) | 19 ± 18 (11) | 0.784 |
| Platelets (D0) | 280 | 228,165 ± 63,844 (225,000) | 232,710 ± 66,141 (234,500) | 223,488 ± 61,279 (215,500) | 0.190 |
| Platelets (D1) | 273 | 238,097 ± 65,987 (230,000) | 244,578 ± 67,834 (241,000) | 231,471 ± 63,612 (219,000) | 0.055 |
| Platelets (D3) | 218 | 257,088 ± 71,750 (251,500) | 265,273 ± 80,414 (263,500) | 249,621 ± 62,241 (242,000) | 0.099 |
| Platelets (D5) | 206 | 264,124 ± 70,517 (264,350) | 272,075 ± 76,534 (269,500) | 257,707 ± 64,893 (258,000) | 0.142 |
| Platelets (D7) | 149 | 272,596 ± 74,070 (268,000) | 285,212 ± 81,139 (281,500) | 265,833 ± 69,485 (262,000) | 0.144 |
| Platelets (D9) | 90 | 268,528 ± 72,885 (269,500) | 246,750 ± 84,726 (249,250) | 275,574 ± 67,827 (273,000) | 0.112 |
| Platelets (D11) | 56 | 270,971 ± 70,057 (258,500) | 265,273 ± 78,216 (253,000) | 272,364 ± 68,808 (278,000) | 0.657 |
| Platelets (D13) | 33 | 276,394 ± 107,343 (266,000) | 255,167 ± 74,516 (265,500) | 281,111 ± 113,959 (266,000) | 0.762 |
| Platelets (D15) | 251 | 266,719 ± 71,390 (263,000) | 277,832 ± 74,732 (275,000) | 254,968 ± 65,964 (251,000) | **0.016** |
| Platelets (D28) | 275 | 238,632 ± 61,406 (235,000) | 243,174 ± 63,990 (240,000) | 233,853 ± 58,421 (230,000) | 0.195 |
| *1Median (IQR); 2Mann-Whitney test* | | | | | |

**Supplementary Table 11: Demonstration of white series values and immunological markers during the study days**

| VARIABLES | **N** | **Total1** | AZVUDINE  N = 1431 | PLACEBO  N = 1381 | **p-value2** |
| --- | --- | --- | --- | --- | --- |
| Leukocytes (D0) | 280 | 6,574 ± 4,055 (6,100) | 6,361 ± 2,380 (5,900) | 6,792 ± 5,249 (6,400) | 0.672 |
| Leukocytes (D1) | 273 | 6,837 ± 5,904 (6,000) | 6,441 ± 2,247 (6,100) | 7,243 ± 8,079 (6,000) | 0.637 |
| Leukocytes (D3) | 218 | 8,224 ± 3,213 (8,100) | 8,541 ± 3,221 (8,250) | 7,935 ± 3,193 (8,000) | 0.177 |
| Leukocytes (D5) | 206 | 8,536 ± 5,871 (7,950) | 8,174 ± 2,926 (8,400) | 8,829 ± 7,447 (7,550) | 0.971 |
| Leukocytes (D7) | 149 | 8,462 ± 4,344 (8,200) | 7,905 ± 2,877 (7,950) | 8,761 ± 4,944 (8,300) | 0.302 |
| Leukocytes (D9) | 90 | 8,207 ± 2,968 (7,800) | 7,161 ± 2,895 (7,200) | 8,546 ± 2,932 (7,950) | 0.089 |
| Leukocytes (D11) | 56 | 8,681 ± 7,709 (7,550) | 6,555 ± 2,476 (6,400) | 9,201 ± 8,455 (7,600) | 0.051 |
| Leukocytes (D13) | 33 | 7,064 ± 1,655 (7,200) | 6,350 ± 1,540 (6,550) | 7,222 ± 1,665 (7,600) | 0.199 |
| Leukocytes (D15) | 251 | 8,062 ± 5,663 (7,600) | 8,092 ± 2,901 (7,900) | 8,030 ± 7,573 (7,400) | 0.130 |
| Leukocytes (D28) | 275 | 6,702 ± 5,942 (6,000) | 7,275 ± 8,096 (6,200) | 6,099 ± 1,742 (5,800) | 0.280 |
| Neutrophils (D0)cells/mm3 | 280 | 3,843 ± 1,881 (3,460) | 3,775 ± 1,925 (3,368) | 3,914 ± 1,839 (3,624) | 0.469 |
| Neutrophils (D1)cells/mm3 | 273 | 3,750 ± 1,976 (3,245) | 3,753 ± 1,808 (3,504) | 3,747 ± 2,141 (3,082) | 0.476 |
| Neutrophils (D3)cells/mm3 | 218 | 5,651 ± 2,930 (5,621) | 5,804 ± 2,962 (5,818) | 5,510 ± 2,907 (5,504) | 0.428 |
| Neutrophils (D5)cells/mm3 | 206 | 4,885 ± 2,422 (4,561) | 4,904 ± 2,395 (4,916) | 4,871 ± 2,454 (4,294) | 0.833 |
| Neutrophils (D7)cells/mm3 | 149 | 5,151 ± 2,210 (4,708) | 4,867 ± 2,110 (4,214) | 5,303 ± 2,258 (4,897) | 0.315 |
| Neutrophils (D9)cells/mm3 | 90 | 4,837 ± 2,633 (4,359) | 4,196 ± 2,526 (4,054) | 5,044 ± 2,651 (4,430) | 0.124 |
| Neutrophils (D11)cells/mm3 | 56 | 4,567 ± 2,354 (4,580) | 3,842 ± 2,254 (3,219) | 4,744 ± 2,368 (4,585) | 0.232 |
| Neutrophils (D13)cells/mm3 | 33 | 4,176 ± 1,475 (4,339) | 4,037 ± 1,660 (4,206) | 4,207 ± 1,464 (4,339) | 0.838 |
| Neutrophils (D15)cells/mm3 | 251 | 4,652 ± 2,145 (4,293) | 4,861 ± 2,317 (4,361) | 4,431 ± 1,931 (4,256) | 0.293 |
| Neutrophils (D28)cells/mm3 | 275 | 3,525 ± 1,575 (3,300) | 3,648 ± 1,759 (3,342) | 3,395 ± 1,350 (3,226) | 0.391 |
| Neutrophils (D0)% | 280 | 58 ± 12 (59) | 57 ± 12 (59) | 59 ± 12 (59) | 0.196 |
| Neutrophils (D1)% | 273 | 56 ± 12 (57) | 56 ± 11 (57) | 56 ± 13 (56) | 0.870 |
| Neutrophils (D3)% | 218 | 65 ± 15 (68) | 65 ± 15 (68) | 65 ± 16 (67) | 0.956 |
| Neutrophils (D5)% | 206 | 58 ± 13 (59) | 57 ± 13 (57) | 58 ± 13 (59) | 0.452 |
| Neutrophils (D7)% | 149 | 60 ± 12 (60) | 59 ± 12 (58) | 61 ± 11 (60) | 0.186 |
| Neutrophils (D9)% | 90 | 56 ± 13 (56) | 55 ± 15 (55) | 57 ± 12 (56) | 0.725 |
| Neutrophils (D11)% | 56 | 57 ± 12 (58) | 54 ± 16 (53) | 58 ± 11 (58) | 0.688 |
| Neutrophils (D13)% | 33 | 58 ± 14 (60) | 61 ± 18 (63) | 57 ± 13 (59) | 0.560 |
| Neutrophils (D15)% | 251 | 58 ± 12 (59) | 58 ± 12 (59) | 58 ± 12 (59) | 0.872 |
| Neutrophils (D28)% | 275 | 54 ± 12 (55) | 55 ± 12 (55) | 54 ± 12 (55) | 0.507 |
| Lymphocytes %(D0) | 280 | 1,827 ± 692 (1,725) | 1,861 ± 745 (1,732) | 1,792 ± 634 (1,706) | 0.400 |
| Lymphocytes %(D1) | 273 | 2,026 ± 706 (1,974) | 2,042 ± 705 (2,012) | 2,010 ± 709 (1,924) | 0.497 |
| Lymphocytes %(D3) | 218 | 2,062 ± 895 (1,902) | 2,116 ± 875 (2,044) | 2,012 ± 914 (1,842) | 0.196 |
| Lymphocytes %(D5) | 206 | 2,583 ± 970 (2,377) | 2,600 ± 1,015 (2,458) | 2,569 ± 937 (2,348) | 0.870 |
| Lymphocytes %(D7) | 149 | 2,493 ± 906 (2,331) | 2,595 ± 1,048 (2,400) | 2,438 ± 821 (2,287) | 0.495 |
| Lymphocytes %(D9) | 90 | 2,812 ± 2,425 (2,486) | 3,204 ± 4,693 (2,316) | 2,686 ± 918 (2,559) | 0.132 |
| Lymphocytes %(D11) | 56 | 2,388 ± 860 (2,236) | 2,338 ± 1,371 (1,931) | 2,401 ± 704 (2,340) | 0.119 |
| Lymphocytes %(D13) | 33 | 2,100 ± 687 (2,117) | 1,740 ± 741 (1,686) | 2,180 ± 662 (2,323) | 0.189 |
| Lymphocytes %(D15) | 251 | 2,451 ± 1,081 (2,304) | 2,528 ± 1,020 (2,394) | 2,370 ± 1,140 (2,253) | 0.183 |
| Lymphocytes %(D28) | 275 | 2,045 ± 626 (2,001) | 2,046 ± 622 (2,005) | 2,044 ± 632 (1,999) | 0.997 |
| *1Median (IQR); 2Mann-Whitney test* | | | | | |

**Supplementary Table 12: Objectives and outcomes**

| **OBJECTIVE AND OUTCOMES** | **p-value** |
| --- | --- |
| Score Reduction | >0,999 |
| Cure time/absence of viral RNA | **<0.001** |
| Viral load negative time | **<0.001** |
| Days 1st Negative Conversion | **<0.001** |
| Days 2st Negative Conversion | **<0.001** |
| Medication use time | **<0.001** |
| Moment of viral load reduction | D3, D5, D9, D11 |
| Participants who did not become viral load negative within 14 days | 1,77% |
